# Supplementary material
Source: Springer Nature journal article supplement (https://www.springermedizin.de/resource/supplementary/12936_2011_2024_MOESM2_ESM.pdf/9543350)

# GT Repeat Frequency

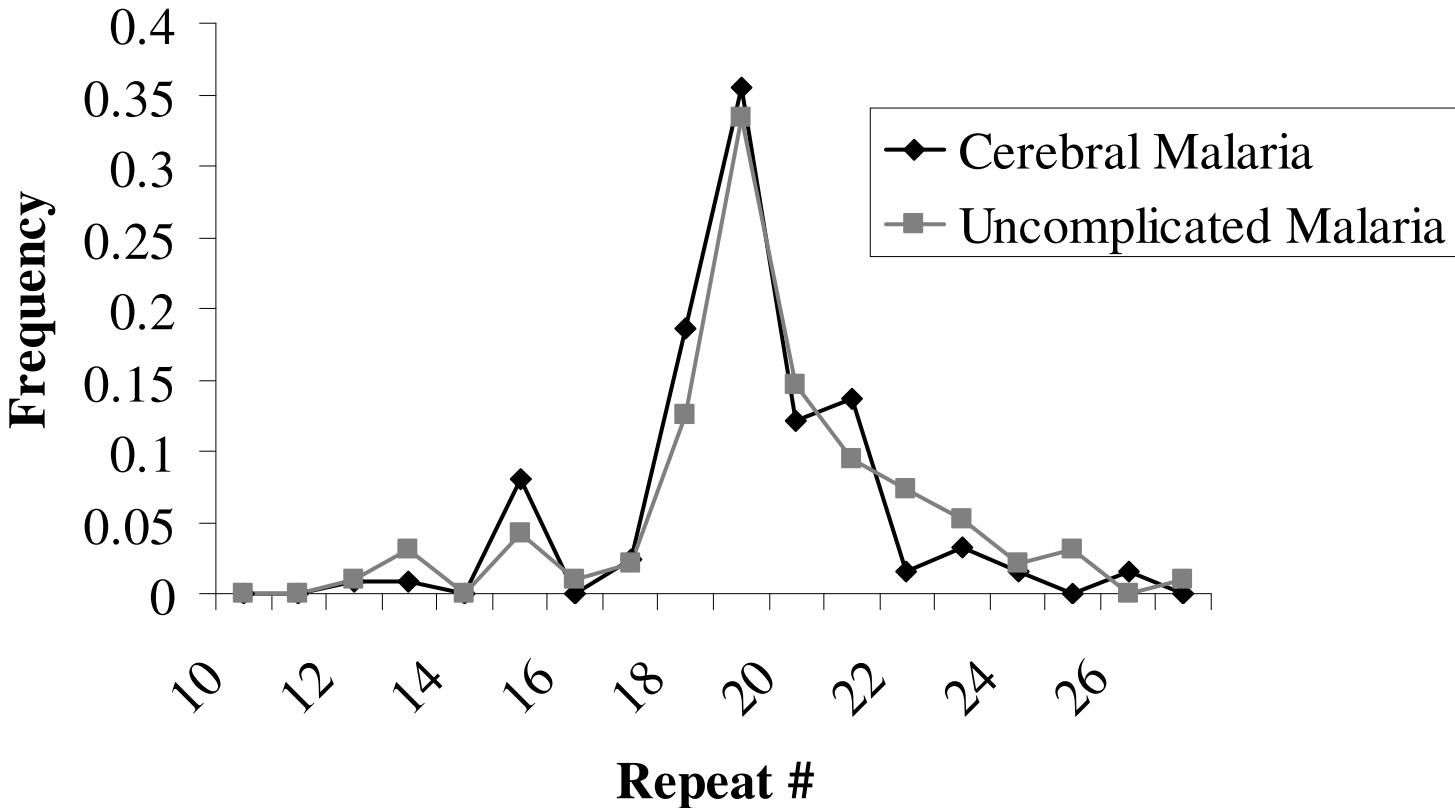

Supplement: MOESM2 [file 9543350]
